# Supplementary material for: Printability, Durability, Contractility and Vascular Network Formation in 3D Bioprinted Cardiac Endothelial Cells Using Alginate–Gelatin Hydrogels
Source: PubMed Central journal article supplement (PMC7968457; doi:10.3389/fbioe.2021.636257), 2021-02-26
Supplement: Image_1.pdf [file Image_1.pdf]

## SUPPLEMENTARY FIGURES AND LEGENDS

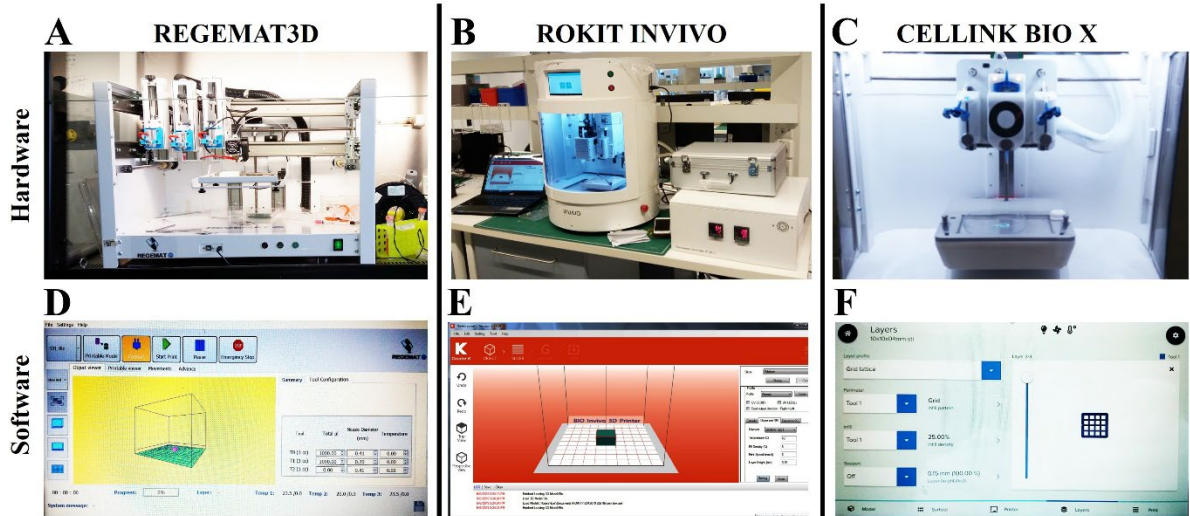

**Supplementary Figure 1. 3D bioprinting platforms used: a custom-made REGEMAT3D model (left column), the ROKIT INVIVO (middle column) and the CELLINK BIO X (right column). Hardware (A-C) and software (D-F) are shown for these three extrusion-based 3D bioprinting systems. The REGEMAT3D customised (D) and INVIVO ‘Creator K’ (E) software were both accessed on a laptop computer connected to the bioprinter by USB cable and the BIO X software (F) was entirely inbuilt on the bioprinter touchscreen.**
